# Supplementary material for: Vessel wall differences between middle cerebral artery and basilar artery plaques on magnetic resonance imaging
Source: PubMed Central journal article supplement (PMC5137109; doi:10.1038/srep38534), 2016-12-05
Supplement: srep38534-s1.pdf [file srep38534-s1.pdf]

---

**Vessel wall differences between middle cerebral artery and basilar artery  
plaques on magnetic resonance imaging**

Peng-Peng Niu, MD<sup>1</sup>; Yao Yu, MD<sup>1</sup>; Hong-Wei Zhou, MD<sup>2</sup>; Yang Liu, MD<sup>2</sup>; Yun Luo,  
MD<sup>1</sup>; Zhen-Ni Guo, MD<sup>1</sup>; Hang Jin, MD<sup>1</sup>; Yi Yang, MD, PhD<sup>1\*</sup>

<sup>1</sup>Stroke Center, Department of Neurology, The First Hospital of Jilin University,  
Xinmin Street 71#, Changchun 130021, China;

<sup>2</sup>Department of Radiology, The First Hospital of Jilin University, Xinmin Street 71#,  
Changchun 130021, China.

**Supplementary Information:**

**Supplementary Table S1.** Estimates of null model for remodeling ratio.

**Supplementary Table S2.** Estimates of the final model for remodeling ratio.

**Supplementary Table S3.** Model fit of final model and null model for remodeling  
ratio.

**Supplementary Table S4.** Estimates of null model for eccentricity index.

**Supplementary Table S5.** Estimates of the final model for eccentricity index.

**Supplementary Table S6.** Estimates of null model for plaque range.

**Supplementary Table S7.** Estimates of the final model for plaque range.

**Supplementary Table S8.** Additional analysis.

**Supplementary Fig. S1.** Linear regression for remodeling ratio as a function of  
stenosis and plaque burden. PCC, pearson correlation coefficients.

**Supplementary Fig. S2.** The relationships among remodeling ratio, degree of  
stenosis, and plaque burden.

---

Supplementary Table S1. Estimates of null model for remodeling ratio.

| Parameter             | Estimate | Std. Error | T/Z value | P value |
|-----------------------|----------|------------|-----------|---------|
| Fixed Effects         |          |            |           |         |
| Intercept             | 1.0673   | 0.0156     | 68.57     | <0.001  |
| Covariance Parameters |          |            |           |         |
| Residual              | 0.0119   | 0.0033     | 3.59      | <0.001  |
| Intercept             | 0.0074   | 0.0041     | 1.81      | 0.035   |

-2LL = -108.7, AIC = -104.7, AICC = -104.6, BIC = -100.2.

ICC = 38.34%.

The restricted maximum likelihood estimation was used.

LL, log likelihood; AIC, Akaike's information criterion; AICC, finite sample corrected version of AIC; BIC, Bayesian information criterion; ICC, intra-class correlation coefficient.

Supplementary Table S2. Estimates of the final model for remodeling ratio.

| Parameter             | Estimate | Std. Error | T/Z value | P value |
|-----------------------|----------|------------|-----------|---------|
| Fixed Effects         |          |            |           |         |
| Intercept             | 1.1977   | 0.0412     | 29.05     | <.0001  |
| Plaque location*      | -0.0095  | 0.0317     | -0.30     | 0.7681  |
| Degree of stenosis    | -0.3849  | 0.0811     | -4.75     | <.0001  |
| Symptomatic plaque    | -0.0268  | 0.0286     | -0.94     | 0.3636  |
| Indeterminate plaque  | -0.0031  | 0.0388     | -0.08     | 0.9368  |
| Asymptomatic plaque†  | 0        | —          | —         | —       |
| Covariance Parameters |          |            |           |         |
| Residual              | 0.0106   | 0.0032     | 3.34      | 0.0004  |
| Intercept             | 0.0047   | 0.0036     | 1.31      | 0.0956  |

-2LL = -114.7, AIC = -110.7, AICC = -110.6, BIC = -106.3

Explained variance at level 1:  $(0.0119 - 0.0106)/0.0119 = 0.109$ . Explained variance at level 2:  $(0.0074 - 0.0047)/0.0074 = 0.365$ .

The restricted maximum likelihood estimation was used.

\* Middle cerebral artery plaque vs. basilar artery plaque.

†Reference for symptomatic plaque and indeterminate plaque.

LL, log likelihood; AIC, Akaike's information criterion; AICC, finite sample corrected version of AIC; BIC, Bayesian information criterion; ICC, intra-class correlation coefficient.

---

Supplementary Table S3. Model fit of final model and null model for remodeling ratio.

| Parameter | Final Model | Null Model |
|-----------|-------------|------------|
| -2LL      | -140.3      | -115.2     |
| AIC       | -126.3      | -109.2     |
| AICC      | -125.0      | -109.0     |
| BIC       | -110.8      | -102.4     |

The lower the better for the parameters.

The -2LL of the final model was small than that of the null model (chi-square value= $-115.2 - (-140.3) = 25.1$ , degree of freedom= $7-3=4$ ,  $P < 0.001$ ).

The maximum likelihood estimation was used.

LL, log likelihood; AIC, Akaike's information criterion; AICC, finite sample corrected version of AIC; BIC, Bayesian information criterion.

---

Supplementary Table S4. Estimates of null model for eccentricity index.

| Parameter             | Estimate | Std. Error | T/Z value | P value |
|-----------------------|----------|------------|-----------|---------|
| Fixed Effects         |          |            |           |         |
| Intercept             | 0.5540   | 0.0110     | 50.59     | <0.001  |
| Covariance Parameters |          |            |           |         |
| Residual              | 0.0027   | 0.0008     | 3.52      | <0.001  |
| Intercept             | 0.0064   | 0.0017     | 3.76      | <0.001  |

-2LL = -204.7, AIC = -200.7, AICC = -200.6, BIC = -196.2.

ICC= 29.67%.

About 30 per cent of the variance in eccentricity index stems from differences among patients. This clearly indicates that a multilevel model is required.

The restricted maximum likelihood estimation was used.

LL, log likelihood; AIC, Akaike's information criterion; AICC, finite sample corrected version of AIC; BIC, Bayesian information criterion; ICC, intra-class correlation coefficient.

Supplementary Table S5. Estimates of the final model for eccentricity index.

| Parameter             | Estimate | Std. Error | T/Z value | P value |
|-----------------------|----------|------------|-----------|---------|
| Fixed Effects         |          |            |           |         |
| Intercept             | 0.6113   | 0.0529     | 11.55     | <.0001  |
| Plaque location*      | 0.0158   | 0.0179     | 0.88      | 0.3865  |
| Plaque burden         | -0.0559  | 0.0382     | -1.46     | 0.1556  |
| Symptomatic plaque    | 0.0361   | 0.0147     | 2.45      | 0.0280  |
| Indeterminate plaque  | -0.0008  | 0.0206     | -0.04     | 0.9694  |
| Asymptomatic plaque†  | 0        | —          | —         | —       |
| Covariance Parameters |          |            |           |         |
| Residual              | 0.0018   | 0.0006     | 3.01      | 0.0013  |
| Intercept             | 0.0049   | 0.0014     | 3.38      | 0.0004  |

-2LL = -210.2, AIC = -206.2, AICC = -206.0, BIC = -201.7

Explained variance at level 1:  $(0.0027 - 0.0018)/0.0027 = 0.333$ . Explained variance at level 2:  $(0.0064 - 0.0049)/0.0064 = 0.234$ .

The restricted maximum likelihood estimation was used.

\* Middle cerebral artery plaque vs. basilar artery plaque.

†Reference for symptomatic plaque and indeterminate plaque.

LL, log likelihood; AIC, Akaike's information criterion; AICC, finite sample corrected version of AIC; BIC, Bayesian information criterion; ICC, intra-class correlation coefficient.

---

Supplementary Table S6. Estimates of null model for plaque range.

| Parameter             | Estimate | Std. Error | T/Z value | P value |
|-----------------------|----------|------------|-----------|---------|
| Fixed Effects         |          |            |           |         |
| Intercept             | 146.37   | 6.37       | 22.98     | <0.001  |
| Covariance Parameters |          |            |           |         |
| Residual              | 1927.90  | 628.36     | 3.07      | 0.001   |
| Intercept             | 1385.88  | 826.20     | 1.68      | 0.047   |

-2LL = 1092.2, AIC = 1096.2, AICC = 1096.3, BIC = -1100.7.

ICC= 41.82%.

About 42 per cent of the variance in plaque range stems from differences among patients. This clearly indicates that a multilevel model is required.

The restricted maximum likelihood estimation was used.

LL, log likelihood; AIC, Akaike's information criterion; AICC, finite sample corrected version of AIC; BIC, Bayesian information criterion; ICC, intra-class correlation coefficient.

Supplementary Table S7. Estimates of the final model for plaque range.

| Parameter             | Estimate | Std. Error | T /Z value | P value |
|-----------------------|----------|------------|------------|---------|
| Fixed Effects         |          |            |            |         |
| Intercept             | 87.7430  | 30.4984    | 2.88       | 0.0054  |
| Plaque location*      | 5.4762   | 10.2353    | 0.54       | 0.5972  |
| Plaque burden         | 47.3883  | 21.5642    | 2.20       | 0.0371  |
| Symptomatic plaque    | -21.2443 | 9.4811     | -2.24      | 0.0418  |
| Indeterminate plaque  | -29.4718 | 12.3427    | -2.39      | 0.0316  |
| Asymptomatic plaque†  | 0        | —          | —          | —       |
| Covariance Parameters |          |            |            |         |
| Residual              | 1460.55  | 343.58     | 4.25       | <0.001  |
| Intercept             | 139.02   | 291.71     | 0.48       | 0.3168  |

-2LL = 963.9, AIC = 967.9, AICC = 968.0, BIC = 972.3

Explained variance at level 1:  $(1927.90 - 1460.55) / 1927.90 = 24.24\%$ . Explained variance at level 1:  $(1385.88 - 139.02) / 1385.88 = 89.97\%$ .

\* Middle cerebral artery plaque vs. basilar artery plaque.

†Reference for symptomatic plaque and indeterminate plaque.

LL, log likelihood; AIC, Akaike's information criterion; AICC, finite sample corrected version of AIC; BIC, Bayesian information criterion; ICC, intra-class correlation coefficient.



Supplementary Table S8. Additional analysis.

| Parameter            | Estimate | Std. Error | T value | P value |
|----------------------|----------|------------|---------|---------|
| Remodeling ratio     |          |            |         |         |
| Plaque location*     | -0.0423  | 0.0314     | -1.35   | 0.1875  |
| Degree of stenosis   | -0.2178  | 0.0687     | -3.17   | 0.0035  |
| Symptomatic plaque   | -0.0116  | 0.0278     | -0.42   | 0.6819  |
| Indeterminate plaque | -0.0056  | 0.0397     | -0.14   | 0.8893  |
| Asymptomatic plaque† | 0        | —          | —       | —       |
| Eccentricity index   |          |            |         |         |
| Plaque location*     | 0.0252   | 0.0186     | 1.35    | 0.1859  |
| Plaque burden        | 0.0354   | 0.0323     | 1.10    | 0.2810  |
| Symptomatic plaque   | 0.0345   | 0.0154     | 2.25    | 0.0372  |
| Indeterminate plaque | -0.0115  | 0.0219     | -0.52   | 0.6075  |
| Asymptomatic plaque† | 0        | —          | —       | —       |
| Plaque range         |          |            |         |         |
| Plaque location*     | 6.2467   | 10.4012    | 0.60    | 0.5526  |
| Plaque burden        | 61.6742  | 19.2759    | 3.20    | 0.0321  |
| Symptomatic plaque   | -23.4035 | 9.2089     | -2.54   | 0.0205  |
| Indeterminate plaque | -33.2456 | 12.8160    | -2.59   | 0.0183  |
| Asymptomatic plaque† | 0        | —          | —       | —       |

\* Middle cerebral artery plaque vs. basilar artery plaque. † Reference for symptomatic plaque and indeterminate plaque. Ten plaques with  $\geq 50\%$  stenosis were included in the final model.

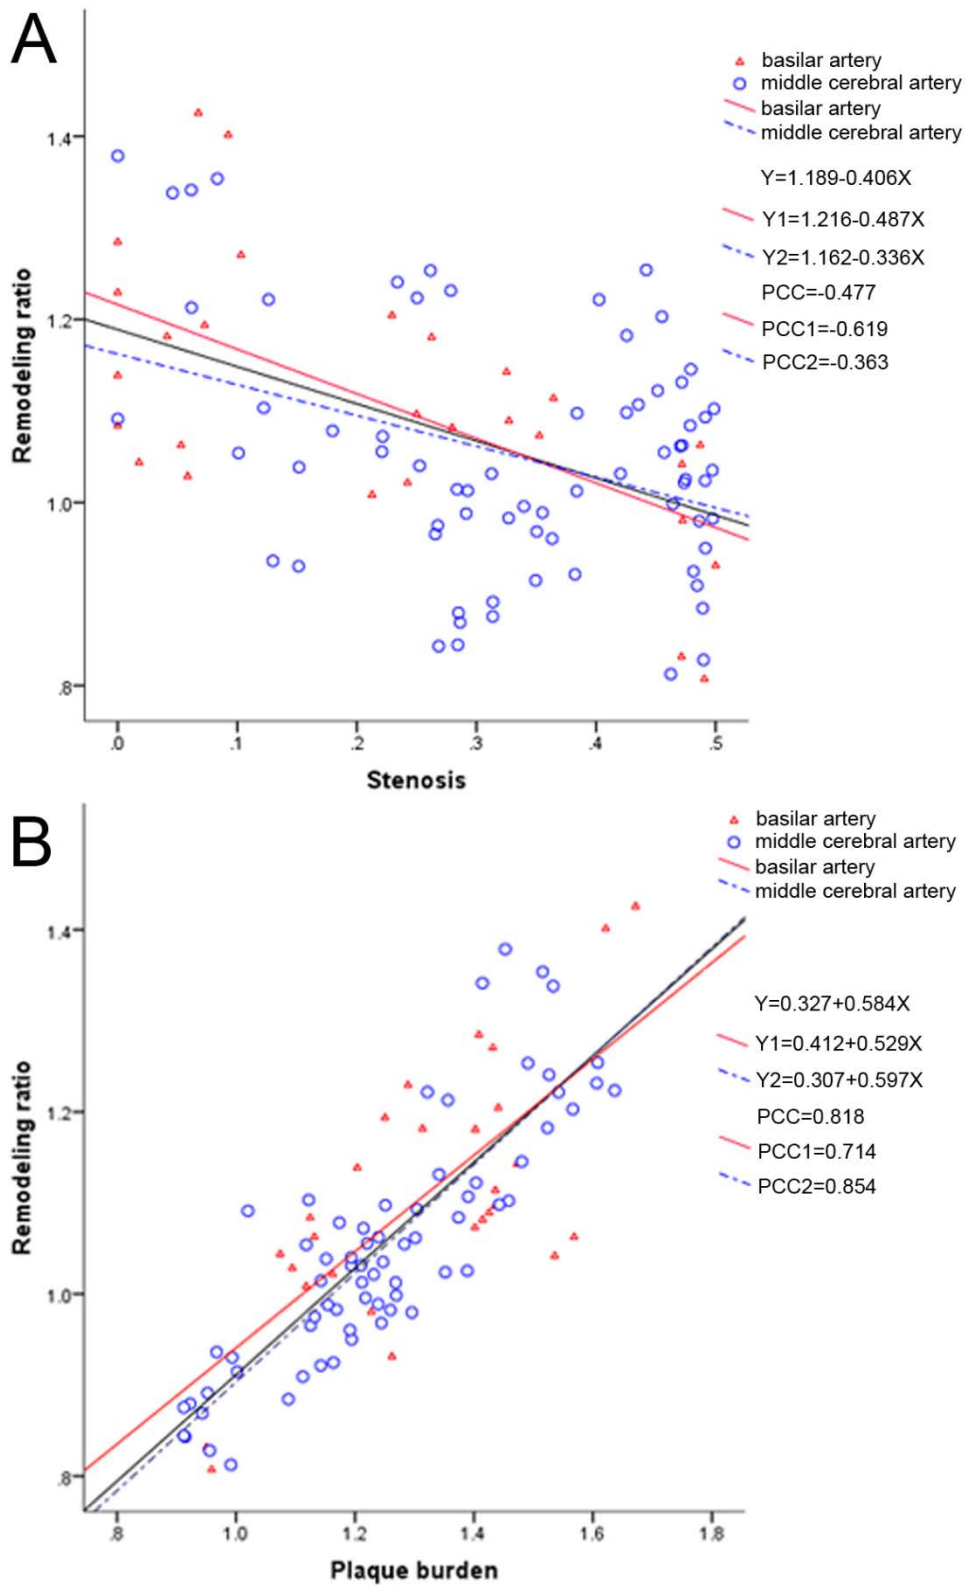

Supplementary Fig. S1. Linear regression for remodeling ratio as a function of stenosis (A) and plaque burden (B). PCC, pearson correlation coefficients.

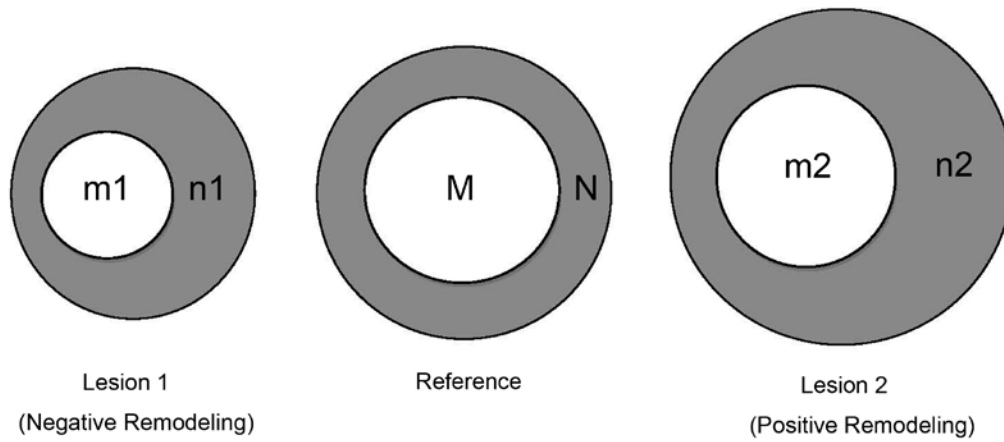

$$\text{Stenosis} = (M-m)/M$$

$$\text{Plaque Burden} = n/N$$

$$\text{Remodeling Ratio} = (m+n)/(M+N) = M/(M+N) - \text{Stenosis} \times M/(M+N) + (\text{Plaque Burden}) \times N/(M+N)$$

Supplementary Fig. S2. The relationships among remodeling ratio, degree of stenosis, and plaque burden.
